# Supplementary material for: Bamboo leaf-assisted formation of carbon/nitrogen co-doped anatase TiO2modified with silver and graphitic carbon nitride: novel and green synthesis and cooperative photocatalytic activity
Source: Royal Society of Chemistry journal article supplement (doi:10.1039/c4dt02101k), 2014-07-28
Supplement: c4dt02101k1.pdf [file c4dt02101k1.pdf]

## ***Electronic Supporting Information***

### **Bamboo leaves-assisted formation of carbon/nitrogen co-doped anatase TiO<sub>2</sub> modified by silver and graphitic carbon nitride: novel and green synthesis and cooperative photocatalytic activity**

Zhifeng Jiang, Dong Liu, Deli Jiang, Wei Wei, Kun Qian, Min Chen and Jimin Xie\*

School of Chemistry and Chemical Engineering, Jiangsu University, Zhenjiang, 212013, P. R. China

**\*Corresponding author:** Jimin Xie

Tel.: +86 11 88791708; fax: +86 11 88791800;

E-mail address: xiejm391@sohu.com

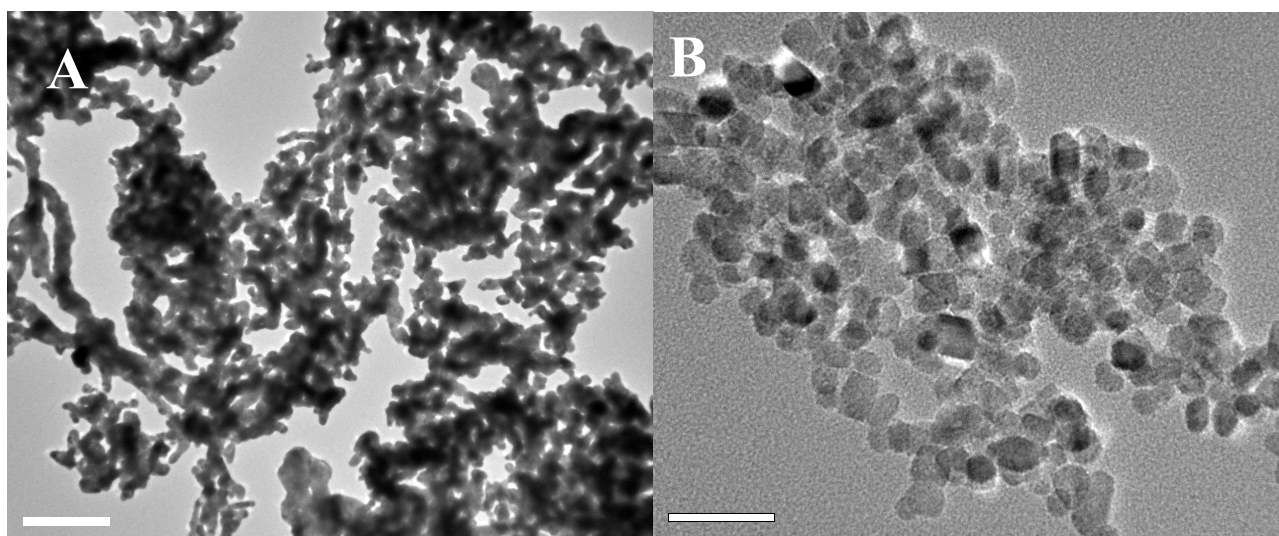

**Fig. S1** TEM images of pure Ag (A) and TiO<sub>2</sub> (B).
